# Supplementary material
Source: PubMed Central journal article supplement (PMC6057830)
Supplement: NIHMS955413-supplement-1.pdf [file NIHMS955413-supplement-1.pdf]

| <b>Table S1. Baseline Characteristics by Quartile of PIIINP in Health ABC Subcohort</b> |                   |                   |                   |                   |
|-----------------------------------------------------------------------------------------|-------------------|-------------------|-------------------|-------------------|
|                                                                                         | <b>Q1</b>         | <b>Q2</b>         | <b>Q3</b>         | <b>Q4</b>         |
| <b>Range of PIIINP (ug/L)</b>                                                           | <1.39             | 1.39 - 2.49       | 2.50 - 4.04       | >4.04             |
| <b>N</b>                                                                                | 126               | 125               | 126               | 125               |
| <b>Age</b>                                                                              | 73 ± 3            | 74 ± 3            | 74 ± 3            | 73 ± 3            |
| <b>Female</b>                                                                           | 78 (62%)          | 69 (55%)          | 49 (39%)          | 47 (38%)          |
| <b>African-American</b>                                                                 | 41 (33%)          | 46 (37%)          | 44 (35%)          | 64 (51%)          |
| <b>Site</b>                                                                             |                   |                   |                   |                   |
| Memphis                                                                                 | 58 (46%)          | 66 (53%)          | 70 (56%)          | 67 (54%)          |
| Pittsburgh                                                                              | 68 (54%)          | 59 (47%)          | 56 (44%)          | 58 (46%)          |
| <b>Education</b>                                                                        |                   |                   |                   |                   |
| Less than high school                                                                   | 26 (21%)          | 23 (19%)          | 32 (25%)          | 34 (27%)          |
| High school graduate                                                                    | 50 (40%)          | 42 (34%)          | 45 (36%)          | 34 (27%)          |
| Postsecondary education                                                                 | 49 (39%)          | 59 (48%)          | 49 (39%)          | 57 (46%)          |
| <b>Diabetes mellitus</b>                                                                | 22 (18%)          | 28 (23%)          | 29 (23%)          | 39 (32%)          |
| <b>Hemoglobin A1c (%)</b>                                                               | 6.16 ± 0.98       | 6.35 ± 1.28       | 6.36 ± 1.12       | 6.74 ± 1.66       |
| <b>Hypertension</b>                                                                     | 78 (62%)          | 77 (62%)          | 84 (67%)          | 85 (68%)          |
| <b>Systolic blood pressure (mm Hg)</b>                                                  | 133 ± 22          | 133 ± 19          | 137 ± 21          | 133 ± 21          |
| <b>Diastolic blood pressure (mm Hg)</b>                                                 | 68 ± 11           | 69 ± 11           | 73 ± 13           | 71 ± 10           |
| <b>Antihypertensive medication use</b>                                                  | 68 (54%)          | 61 (49%)          | 66 (53%)          | 76 (61%)          |
| <b>RAAS blockade use</b>                                                                | 23 (18%)          | 18 (14%)          | 19 (15%)          | 19 (15%)          |
| <b>Smoking</b>                                                                          |                   |                   |                   |                   |
| Never                                                                                   | 50 (40%)          | 61 (49%)          | 47 (37%)          | 45 (36%)          |
| Former                                                                                  | 64 (51%)          | 54 (43%)          | 70 (56%)          | 72 (58%)          |
| Current                                                                                 | 12 (10%)          | 10 (8%)           | 9 (7%)            | 8 (6%)            |
| <b>Prevalent Cardiovascular Disease</b>                                                 | 34 (27%)          | 27 (22%)          | 31 (25%)          | 44 (36%)          |
| <b>Prevalent Heart Failure</b>                                                          | 3 (2%)            | 2 (2%)            | 5 (4%)            | 7 (6%)            |
| <b>Body Mass Index (kg/m<sup>2</sup>)</b>                                               | 27.0 ± 4.7        | 26.9 ± 4.8        | 27.1 ± 4.0        | 27.7 ± 4.3        |
| <b>C-reactive Protein (mg/L)</b>                                                        | 1.46 [0.99, 3.01] | 1.52 [0.99, 2.76] | 1.64 [1.00, 2.86] | 2.01 [0.95, 3.23] |
| <b>Albumin (mg/dL)</b>                                                                  | 4.01 ± 0.33       | 4.00 ± 0.29       | 4.04 ± 0.31       | 3.93 ± 0.32       |
| <b>Total cholesterol (mg/dL)</b>                                                        | 203 ± 40          | 200 ± 39          | 205 ± 36          | 198 ± 39          |
| <b>Low-density lipoprotein (mg/dL)</b>                                                  | 120 ± 36          | 120 ± 33          | 124 ± 35          | 120 ± 36          |
| <b>High-density lipoprotein (mg/dL)</b>                                                 | 56 ± 19           | 54 ± 16           | 51 ± 17           | 52 ± 16           |
| <b>Triglycerides (mg/dL)</b>                                                            | 127 [91, 176]     | 114 [88, 156]     | 131 [92, 179]     | 115 [87, 154]     |
| <b>Lipid-lowering medication use</b>                                                    | 18 (14%)          | 13 (10%)          | 16 (13%)          | 22 (18%)          |
| <b>eGFR (ml/min/1.73m<sup>2</sup>)</b>                                                  | 76 ± 17           | 74 ± 17           | 71 ± 19           | 71 ± 20           |
| <b>eGFR&lt;60 ml/min/1.73m<sup>2</sup></b>                                              | 17 (14%)          | 24 (19%)          | 36 (29%)          | 35 (28%)          |
| <b>Albumin/creatinine ratio (mg/g)</b>                                                  | 7 [4, 14]         | 6 [4, 16]         | 9 [5, 24]         | 13 [6, 41]        |
| <b>Albumin/creatinine ratio&gt;30 mg/g</b>                                              | 21 (17%)          | 15 (12%)          | 23 (18%)          | 38 (30%)          |

Data are presented as median [interquartile range], mean ± standard deviation, or numbers (percent).

Abbreviations: eGFR, estimated glomerular filtration rate by CKD-EPI equation for cystatin; PIIINP, pro-collagen type III N-terminal pro-peptide; RAAS blockade, renin-angiotensin-aldosterone system blockade.
