# Supplementary material
Source: PubMed Central journal article supplement (PMC6057830)
Supplement: NIHMS955413-supplement-2.pdf [file NIHMS955413-supplement-2.pdf]

|                                            | <b>Q1</b>         | <b>Q2</b>         | <b>Q3</b>         | <b>Q4</b>         |
|--------------------------------------------|-------------------|-------------------|-------------------|-------------------|
| <b>Range of NGAL (ng/mL)</b>               | <9.51             | 9.51 - 20.84      | 20.85 - 51.75     | >51.75            |
| <b>N</b>                                   | 126               | 125               | 125               | 125               |
| <b>Age</b>                                 | 73 ± 3            | 74 ± 3            | 74 ± 3            | 73 ± 3            |
| <b>Female</b>                              | 58 (46%)          | 47 (38%)          | 68 (54%)          | 70 (56%)          |
| <b>African-American</b>                    | 40 (32%)          | 45 (36%)          | 52 (42%)          | 57 (46%)          |
| <b>Site</b>                                |                   |                   |                   |                   |
| Memphis                                    | 67 (53%)          | 62 (50%)          | 64 (51%)          | 68 (54%)          |
| Pittsburgh                                 | 59 (47%)          | 63 (50%)          | 61 (49%)          | 57 (46%)          |
| <b>Education</b>                           |                   |                   |                   |                   |
| Less than high school                      | 28 (22%)          | 29 (23%)          | 26 (21%)          | 32 (26%)          |
| High school graduate                       | 48 (38%)          | 38 (31%)          | 44 (35%)          | 40 (32%)          |
| Postsecondary education                    | 50 (40%)          | 57 (46%)          | 55 (44%)          | 52 (42%)          |
| <b>Diabetes mellitus</b>                   | 23 (19%)          | 24 (20%)          | 36 (29%)          | 35 (29%)          |
| <b>Hemoglobin A1c (%)</b>                  | 6.22 ± 1.02       | 6.43 ± 1.51       | 6.42 ± 1.17       | 6.56 ± 1.43       |
| <b>Hypertension</b>                        | 91 (72%)          | 72 (58%)          | 78 (62%)          | 82 (66%)          |
| <b>Systolic blood pressure (mm Hg)</b>     | 135 ± 22          | 137 ± 21          | 133 ± 20          | 133 ± 19          |
| <b>Diastolic blood pressure (mm Hg)</b>    | 69 ± 11           | 71 ± 12           | 70 ± 11           | 71 ± 11           |
| <b>Antihypertensive medication use</b>     | 68 (54%)          | 60 (48%)          | 64 (52%)          | 79 (63%)          |
| <b>RAAS blockade use</b>                   | 23 (18%)          | 20 (16%)          | 15 (12%)          | 21 (17%)          |
| <b>Smoking</b>                             |                   |                   |                   |                   |
| Never                                      | 52 (41%)          | 47 (38%)          | 54 (43%)          | 49 (39%)          |
| Former                                     | 70 (56%)          | 71 (57%)          | 59 (47%)          | 60 (48%)          |
| Current                                    | 4 (3%)            | 7 (6%)            | 12 (10%)          | 16 (13%)          |
| <b>Prevalent Cardiovascular Disease</b>    | 34 (27%)          | 36 (29%)          | 27 (22%)          | 39 (32%)          |
| <b>Prevalent Heart Failure</b>             | 6 (5%)            | 3 (2%)            | 3 (2%)            | 5 (4%)            |
| <b>Body Mass Index (kg/m<sup>2</sup>)</b>  | 27.3 ± 4.8        | 27.2 ± 3.9        | 27.4 ± 4.7        | 26.8 ± 4.4        |
| <b>C-reactive Protein (mg/L)</b>           | 1.37 [0.92, 2.17] | 1.49 [0.95, 3.25] | 1.82 [1.04, 3.08] | 1.90 [1.01, 3.48] |
| <b>Albumin (mg/dL)</b>                     | 4.09 ± 0.30       | 3.95 ± 0.29       | 3.98 ± 0.35       | 3.97 ± 0.30       |
| <b>Total cholesterol (mg/dL)</b>           | 196 ± 36          | 206 ± 42          | 205 ± 34          | 199 ± 41          |
| <b>Low-density lipoprotein (mg/dL)</b>     | 115 ± 29          | 127 ± 25          | 124 ± 33          | 117 ± 39          |
| <b>High-density lipoprotein (mg/dL)</b>    | 54 ± 19           | 53 ± 17           | 53 ± 16           | 53 ± 17           |
| <b>Triglycerides (mg/dL)</b>               | 119 [82, 176]     | 125 [84, 164]     | 121 [92, 164]     | 124 [99, 165]     |
| <b>Lipid-lowering medication use</b>       | 19 (15%)          | 10 (8%)           | 18 (15%)          | 22 (18%)          |
| <b>eGFR (ml/min/1.73m<sup>2</sup>)</b>     | 74 ± 18           | 74 ± 17           | 72 ± 20           | 73 ± 20           |
| <b>eGFR&lt;60 ml/min/1.73m<sup>2</sup></b> | 23 (18%)          | 24 (19%)          | 32 (26%)          | 33 (26%)          |
| <b>Albumin/creatinine ratio (mg/g)</b>     | 8 [4, 16]         | 8 [4, 20]         | 8 [4, 17]         | 11 [5, 30]        |
| <b>Albumin/creatinine ratio&gt;30 mg/g</b> | 24 (19%)          | 22 (18%)          | 20 (16%)          | 31 (25%)          |

Data are presented as median (interquartile range), mean ± standard deviation, or numbers (percent).

Abbreviations: eGFR, estimated glomerular filtration rate by CKD-EPI equation for cystatin; NGAL, neutrophil gelatinase-associated lipocalin; RAAS blockade, renin-angiotensin-aldosterone system blockade use.
