# Supplementary material
Source: PubMed Central journal article supplement (PMC6057830)
Supplement: NIHMS955413-supplement-3.pdf [file NIHMS955413-supplement-3.pdf]

**Table S3: Spearman correlations of urinary markers and eGFR**

|                  | $\alpha$ 1m | PIIINP  | NGAL   | Albumin | Urine creatinine | eGFR |
|------------------|-------------|---------|--------|---------|------------------|------|
| $\alpha$ 1m      | ---         |         |        |         |                  |      |
| PIIINP           | 0.660*      | ---     |        |         |                  |      |
| NGAL             | 0.293*      | 0.351*  | ---    |         |                  |      |
| Albumin          | 0.565*      | 0.536*  | 0.378* | ---     |                  |      |
| Urine creatinine | 0.456*      | 0.608*  | 0.431* | 0.458*  | ---              |      |
| eGFR             | -0.214*     | -0.123* | -0.064 | -0.154* | -0.098**         | ---  |

\*\*p<0.05 \*p<0.01

Abbreviations:  $\alpha$ 1m,  $\alpha$ 1-microglobulin; eGFR, estimated glomerular filtration rate; NGAL, neutrophil gelatinase-associated lipocalin; PIIINP, pro-collagen type III N-terminal pro-peptide.
